# Supplementary material for: Sensitive and portable detection of telomerase activity in HeLa cells using the personal glucose meter
Source: Royal Society of Chemistry journal article supplement (doi:10.1039/c4cc03553d), 2014-01-01
Supplement: c4cc03553d1.pdf [file c4cc03553d1.pdf]

1

## Supporting Information

### 2 Experimental Section

#### 3 Materials and reagents

4 DNA sequences, shown as following, were synthesized by Sangon Biotech  
5 (Shanghai) Co., Ltd with purification using PAGE method:

6 DNA primer: 5'-HS (CH<sub>2</sub>)<sub>6</sub>-TTTTTTAATCCGTCGAGCAGAGTT-3',

7 Complementary DNA (cDNA): 5'-NH<sub>2</sub>-TTTTTTCCCAAT CCCAAT-3'.

8 The dNTP mix is purchased from Bioer Technology CO., Ltd. Glycol-bis-(2-  
9 aminoethylether)-N,N,N',N'-tetraacetic acid (EGTA), Phenylmethylsulfonyl fluoride  
10 (PMSF), 3-[(3-cholamidopropyl) dimethylammonio]- 1-propanesulfonate (CHAPS)  
11 are obtained from Bio Basic Inc. (Canada) and use as supplied. Invertase from baker's  
12 yeast (*S. cerevisiae*), 1, 4-phenylene diisothiocyanate (PDITC), and Tris(2-  
13 carboxyethyl) phosphine hydrochloride (TCEP) are bought from Sigma. Other  
14 chemicals employed are all of analytical grade. All the solutions are prepared with  
15 double-distilled water, which has been purified with a Milli-Q purification system.

16 Buffer solutions involved in this work were as follows: immobilization buffer  
17 solution (10 mM Tris-HCl containing 1 mM EDTA, 100 mM NaCl and 10 mM  
18 TCEP, pH 7.4), hybridization buffer solution (10 mM Tris-HCl containing 1 mM  
19 EDTA, 300 mM NaCl and 1 mM MgCl<sub>2</sub>, pH 7.4), extension solution (20 mM Tris-  
20 HCl (pH 8.3), containing 4 mM MgCl<sub>2</sub>, 1 mM EGTA, 63 mM KCl, 0.05% Tween 20,  
21 and 2 mM dNTP), and electrochemical impedance spectroscopy (EIS) test solution  
22 (K<sub>4</sub>[Fe(CN)<sub>6</sub>]/K<sub>3</sub>[Fe(CN)<sub>6</sub>] and 0.1 M KCl, pH 7.4).

#### 23 Preparation of telomerase extractions

24 Telomerase extractions are prepared according to the previous method. HeLa  
25 cells are removed from the substrate by trypsinization, washed with phosphate buffer  
26 solution (pH 7.4) twice and pelleted at 2000 rpm for 10min at 4°C. Next, about 1×10<sup>5</sup>  
27 cells/mL cells are resuspended in a cold CHAPS lysis buffer (10 mM Tris-HCl, pH  
28 7.4, 1 mM MgCl<sub>2</sub>, 1 mM EGTA, 0.1 mM PMSF, 0.5% CHAPS, and 10% glycerol),  
29 incubated for 30 min in ice, and then centrifuged for 20 min(12 000 rpm, 4 °C). The

1 supernatant was flash frozen and stored at -20 °C.

## 2 **Preparation of inverse-modified cDNA**

3 Inverse-functional cDNA (Invertase-cDNA) was prepared firstly. Briefly, 100 µL  
4 of 1 µM cDNA was mixed with 20 mg of PDTIC dissolved in 1 mL DMF with  
5 shaking at room temperature in the dark for 2 h. Next, 3 mL Millipore water and 3 mL  
6 1-butanol were added into above solution with shaking slightly. After 10 min, the  
7 upper organic phase was discarded. And then the aqueous phase was extracted with 2  
8 mL 1-butanol 3 times, and purified by Amicon-10K using hybridization buffer  
9 solution for 3 times to achieved PDITC-activated cDNA. 1 mg of invertase was  
10 introduced above activated DNA in the buffer solution with shaking overnight, and  
11 then the above solution was purified by Amicon-100K 3 time to achieved invertase-  
12 labeled cDNA.

## 13 **Immobilization of primer on SPGE**

14 SPEG (L3.3×W1.0×H0.05, cm) was bought from DropSens (Spain), containing a  
15 4 mm diameter disk gold working electrode, Pt counter electrode and a silver pseudo-  
16 reference electrode. Before the experiment, the electrode was rinsed with ultrapure  
17 water, and dried with nitrogen. For the immobilization, 20 µL of primer buffer  
18 solution contain 0.1 µM primer was dropped on gold working electrode for 120 min  
19 in dark, and the electrode was rinsed to decrease physical adsorption. Then, primer-  
20 modified SPGE surface was passivated using 1 mM MCH solution for 60 min.

## 21 **Elongation of primer**

22 Known amounts of telomerase extracts were mixed into 100 µL 20 mM Tris-HCl  
23 (pH 8.3), containing 4 mM MgCl<sub>2</sub>, 1 mM EGTA, 63 mM KCl, 0.05% Tween 20, and  
24 2 mM dNTP, as the final reaction solution. Next, the reaction solution was introduced  
25 on the primer-immobilized electrode surface to extend the primer at 37 °C for a  
26 certain time. For control experiment, telomerase extracts were heated at 85 °C for 5  
27 min.

## 28 **Assay of telomerase activity using the PGM**

29 The solution containing invertase-cDNA was doped on the above treated  
30 electrode surface for 1 h. For blank experiment, invertase- cDNA was doped on the

1 only primer-immobilized electrode surface with extension reaction. The electrode was  
2 rinsed with ultrapure water to remove away unreacted cDNA. Subsequently, 20  $\mu\text{L}$  of  
3 1 M sucrose was dripped on the electrode surface for 15 min at room temperature.  
4 The resulted solution was detected using the PGM to generate readout signal.

## 5 **Results and Discussions**

6 **Feasibility of this proposed method for telomerase.** In addition,  
7 above changes in the interface of the electrode surface can be also verified by the EIS.  
8 The impedance spectra include the semicircle portion at higher frequencies related to  
9 the electron transfer-limited process, and the linear part at lower frequencies  
10 corresponding to diffusion. The semicircle diameter change reflects the change in the  
11 interfacial charge-transfer resistance ( $R_{ct}$ ), which is associated to the situation on the  
12 electrode. Figure 1S showed the impedance spectra at different modified electrode in  
13 5 mmol/L  $[\text{Fe}(\text{CN})_6]^{3-/4-}$  solution. It is obvious that compared to bare electrode (curve  
14 a),  $R_{ct}$  enhances from 121.5  $\Omega$  to 327.6  $\Omega$  following the immobilization of primer on  
15 the electrode (curve b) due to the repulsion between the negative charge phosphate  
16 backbone of the oligonucleotides and  $[\text{Fe}(\text{CN})_6]^{3-/4-}$ . A similar semicircle is observed  
17 when the modified electrode is incubated with extension solution without the  
18 telomerase (curve c, 412  $\Omega$ ). Further, with the extension reaction (curve d),  $R_{ct}$  is up  
19 to is 1431  $\Omega$ . It is ascribed to the generation of amounts of negative charge DNA.  
20 However, after preheating the telomerase, the  $R_{ct}$  is similar with that of primer-  
21 modified electrode (curve e), showing that no extension reaction occurs. The results  
22 of EIS are corresponding to those of the PGM and the color changes of control  
23 window.

24

25

26 **Figure S1**

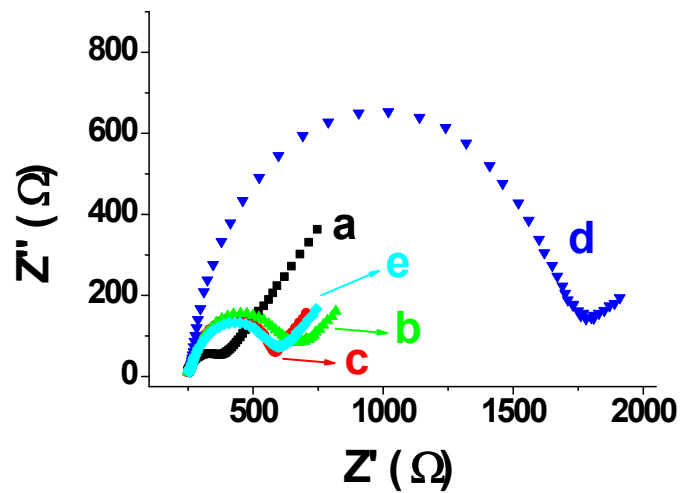

1

2 **Figure S1** Impedance spectra of different modified SPGEs. a) bare electrode; b)  
 3 primer-modified electrode; c) primer-modified electrode without the telomerase; d)  
 4 primer-modified electrode with the telomerase; e) primer-modified electrode with the  
 5 preheated telomerase.

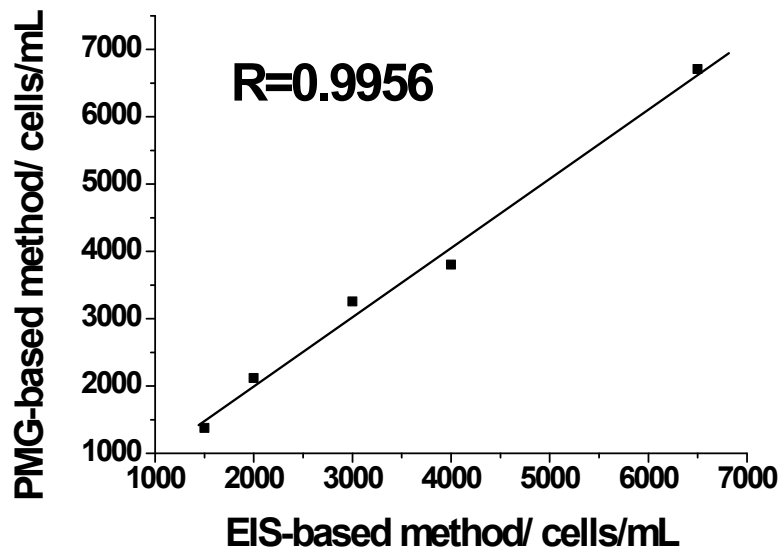

6

7 **Figure S2** Comparison between the proposed PGM-based method and the previous  
 8 EIS-based method. Correlation coefficient of this regression equation is 0.9956.
